# Supplementary figures and images for: Impact of atrial fibrillation on the risk of major adverse cardiac events following coronary revascularisation
Source: HighWire-hosted journal article supplement (doi:10.1136/openhrt-2022-002012), 2022-09-01

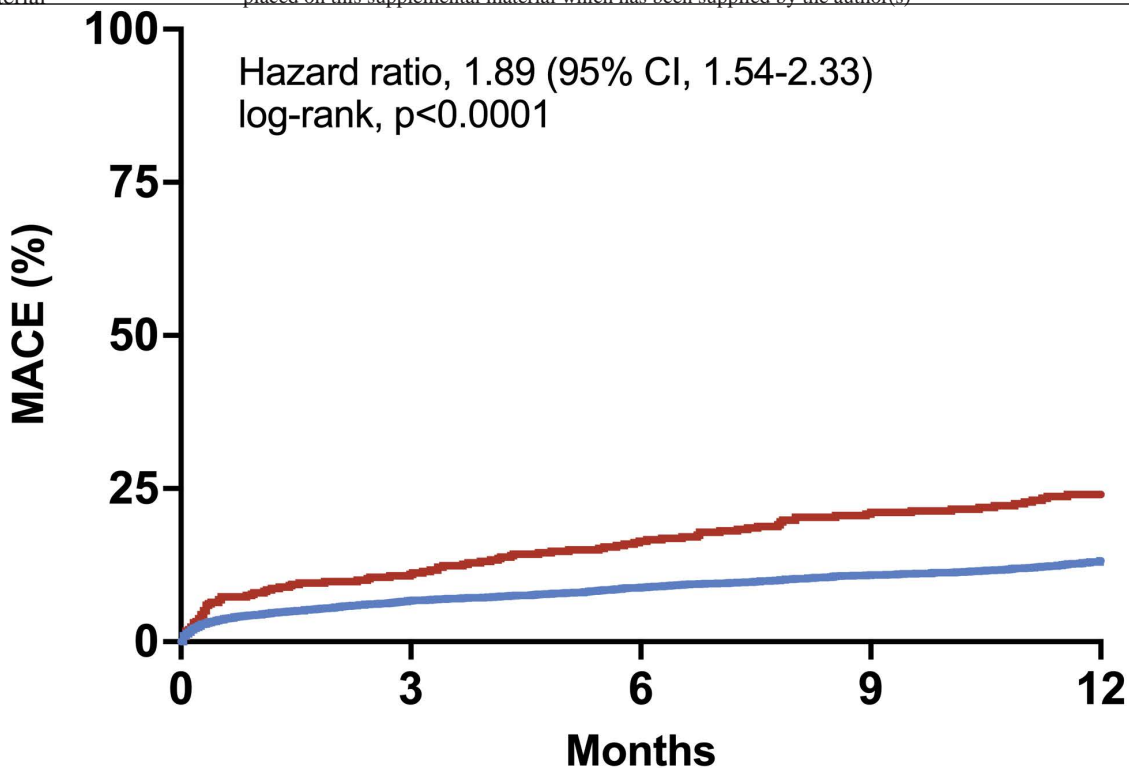**No. at Risk**

|                 |      |      |      |      |      |
|-----------------|------|------|------|------|------|
| Pre-existing AF | 461  | 381  | 350  | 307  | 214  |
| Non- and new AF | 6214 | 5215 | 4970 | 4584 | 3205 |

Supplement: openhrt-2022-002012supp001_data_supplement.pdf [file openhrt-2022-002012supp001_data_supplement.pdf]
